# Supplementary material
Source: PubMed Central journal article supplement (PMC1804126)
Supplement: bmj_39069.489757.55_1.pdf [file bmj_39069.489757.55_1.pdf]

**Required prescription elements for selected oral chemotherapies at 42 US cancer centres [posted as supplied by author]**

| Required element                       | Cape-<br>citabine |    | Cyclophos-<br>phamide |    | Gefitinib |    | Imatinib |    | Metho-<br>trexate |    | Temo-<br>zolomide |    | Mean (row) |    |
|----------------------------------------|-------------------|----|-----------------------|----|-----------|----|----------|----|-------------------|----|-------------------|----|------------|----|
|                                        | N                 | %  | N                     | %  | N         | %  | N        | %  | N                 | %  | N                 | %  | N          | %  |
| Diagnosis                              | 11                | 26 | 9                     | 21 | 9         | 21 | 9        | 21 | 10                | 24 | 11                | 26 | 9.7        | 23 |
| Protocol                               | 11                | 26 | 11                    | 26 | 11        | 26 | 11       | 26 | 11                | 26 | 11                | 26 | 10.9       | 26 |
| Cycle number                           | 5                 | 12 | 4                     | 10 | 3         | 7  | 4        | 10 | 3                 | 7  | 3                 | 7  | 3.8        | 9  |
| Second clinician<br>check              | 8                 | 19 | 9                     | 21 | 8         | 19 | 8        | 19 | 9                 | 21 | 10                | 24 | 8.8        | 21 |
| BSA calculation                        | 16                | 38 | 13                    | 31 | 12        | 29 | 12       | 29 | 14                | 33 | 15                | 36 | 13.9       | 33 |
| Dose per m <sup>2</sup><br>calculation | 17                | 40 | 14                    | 33 | 11        | 26 | 11       | 26 | 15                | 36 | 16                | 38 | 13.9       | 33 |

BSA = body surface area; m<sup>2</sup> = metre squared
